# Supplementary material for: Adequacy of Children’s Psychopharmacology Services: Variations by Race and Clinical Characteristics
Source: Atypon-hosted journal article supplement (doi:10.1176/appi.ps.20220375), 2023-06-08
Supplement: appi.ps.20220375.ds001.pdf [file appi.ps.20220375.ds001.pdf]

## Supplement

### Additional Information about the Rating Strategy

Two expert raters reviewed participants' treatment records for treatment adequacy. Prior to reviewing records, the two raters (one child psychiatrist, one child psychologist) worked together in consultation with an expert health services researcher (masked) to clarify the questions, rating categories, and what guidelines and strategies we would use assign treatment ratings. Raters independently reviewed each participants' treatment and diagnostic record and recorded independent ratings and comments about why each rating was chosen. In consensus meetings convened to review discordant ratings, raters then both shared their ratings and justification for them; each rater had the opportunity to ask the other questions, provided additional information and shared any further thoughts about how to rate the participants' treatment. Using this strategy, the raters were able to achieve consensus for every participant who had sufficient data to provide a rating. Further information about the guidelines the raters consulted can be in Supplemental Table 1; additional examples of treatment ratings by diagnosis can be found in Supplemental Table 2.

**Supplemental Table 1.** Examples of treatment guidelines consulted for psychopharmacotherapy adequacy ratings

| <b>Diagnosis</b>                         | <b>Treatment Guidelines Consulted</b>                                                                                                                                                                                                                                                                                                                                                                                                                                                                                                                                                                                                                                                                                                                                                                                                                                                                    |
|------------------------------------------|----------------------------------------------------------------------------------------------------------------------------------------------------------------------------------------------------------------------------------------------------------------------------------------------------------------------------------------------------------------------------------------------------------------------------------------------------------------------------------------------------------------------------------------------------------------------------------------------------------------------------------------------------------------------------------------------------------------------------------------------------------------------------------------------------------------------------------------------------------------------------------------------------------|
| Attention deficit hyperactivity disorder | <ul style="list-style-type: none"> <li data-bbox="600 955 1427 1186">• Wolraich ML, Hagan JF, Allan C, et al. AAP Subcommittee on children and adolescents with attention-deficit/hyperactive disorder. Clinical Practice Guideline for the Diagnosis, Evaluation, and Treatment of Attention-Deficit/Hyperactivity Disorder in Children and Adolescents. <i>Pediatrics</i>. 2019;144(4):e20192528</li> <li data-bbox="600 1186 1427 1396">• Pliszka S. Practice Parameter for the Assessment and Treatment of Children and Adolescents with Attention-Deficit/Hyperactivity Disorder. <i>J Am Acad Child Adolesc Psychiatry</i>. 2007;46(7):894-921. doi:10.1097/chi.0b013e318054e724</li> </ul>                                                                                                                                                                                                        |
| Anxiety disorders                        | <ul style="list-style-type: none"> <li data-bbox="600 1396 1427 1585">• Walter HJ, Bukstein OG, Abright AR, et al. Clinical Practice Guideline for the Assessment and Treatment of Children and Adolescents with Anxiety Disorders. <i>J Am Acad Child Adolesc Psychiatry</i>. Oct 2020;59(10):1107-1124. doi:10.1016/j.jaac.2020.05.005</li> <li data-bbox="600 1585 1427 1732">• Cohen JA. Practice Parameter for the Assessment and Treatment of Children and Adolescents with Posttraumatic Stress Disorder. <i>J Am Acad Child Adolesc Psychiatry</i>. 2010;49(4):414-430. doi:10.1016/j.jaac.2009.12.020</li> <li data-bbox="600 1732 1427 1877">• Geller DA, March J. Practice Parameter for the Assessment and Treatment of Children and Adolescents with Obsessive-Compulsive Disorder. <i>J Am Acad Child Adolesc Psychiatry</i>. 2012;51(1):98-113. doi:10.1016/j.jaac.2011.09.019</li> </ul> |

Bipolar disorders

- McClellan J, Kowatch R, Findling RL, Work Group on Quality I. Practice parameter for the assessment and treatment of children and adolescents with bipolar disorder. *J Am Acad Child Adolesc Psychiatry*. Jan 2007;46(1):107-125. doi:10.1097/01.chi.0000242240.69678.c4
- Nivoli AM, Colom F, Murru A, et al. New treatment guidelines for acute bipolar depression: a systematic review. *J Affect Disord*. Mar 2011;129(1-3):14-26. doi:10.1016/j.jad.2010.05.018
- Kowatch RA, Fristad M, Birmaher B, Wagner KD, Findling RL, Hellander M; Child Psychiatric Workgroup on Bipolar Disorder. Treatment guidelines for children and adolescents with bipolar disorder. *J Am Acad Child Adolesc Psychiatry*. 2005 Mar;44(3):213-35. doi: 10.1097/00004583-200503000-00006.
- Grunze H, Vieta E, Goodwin GM, et al. The World Federation of Societies of Biological Psychiatry (WFSBP) Guidelines for the Biological Treatment of Bipolar Disorders: Update 2012 on the long-term treatment of bipolar disorder. *The World Journal of Biological Psychiatry*. 2013;14(3):154-219. doi:10.3109/15622975.2013.770551
- National Collaborating Centre for Mental Health (UK). *Bipolar Disorder: The NICE Guideline on the Assessment and Management of Bipolar Disorder in Adults, Children and Young People in Primary and Secondary Care*. London: The British Psychological Society and The Royal College of Psychiatrists; September 2014.

---

Depressive disorders

- Birmaher B, Brent D, AACAP Work Group on Quality Issues. Practice parameter for the assessment and treatment of children and adolescents with depressive disorders. *J Am Acad Child Adolesc Psychiatry*. Nov 2007;46(11):1503-26. doi:10.1097/chi.0b013e318145ae1c
  - Cheung AH, Zuckerbrot RA, Jensen PS, Laraque D, Stein REK, Glad-Pc Steering Group. Guidelines for Adolescent Depression in Primary Care (GLAD-PC): Part II. Treatment and Ongoing Management. *Pediatrics*. Mar 2018;141(3)doi:10.1542/peds.2017-4082
  - Zuckerbrot RA, Cheung A, Jensen PS, Stein REK, Laraque D, Glad-Pc Steering Group. Guidelines for Adolescent Depression in Primary Care (GLAD-PC): Part I. Practice Preparation, Identification, Assessment, and Initial Management. *Pediatrics*. Mar 2018;141(3)doi:10.1542/peds.2017-4081
-

---

|                                   |                                                                                                                                                                                                                                                                                                                                                                                                                                                                                                                                                                                                                                                                                                                                                                                                                                                                                                                                                                                                                                                                      |
|-----------------------------------|----------------------------------------------------------------------------------------------------------------------------------------------------------------------------------------------------------------------------------------------------------------------------------------------------------------------------------------------------------------------------------------------------------------------------------------------------------------------------------------------------------------------------------------------------------------------------------------------------------------------------------------------------------------------------------------------------------------------------------------------------------------------------------------------------------------------------------------------------------------------------------------------------------------------------------------------------------------------------------------------------------------------------------------------------------------------|
| Disruptive behavior disorders     | <ul style="list-style-type: none"><li>• National Collaborating Centre for Mental Health (UK). <i>Antisocial behaviour and conduct disorders in children and young people: recognition and management</i>. London: The British Psychological Society and The Royal College of Psychiatrists; March 2013.<br/><a href="https://www.nice.org.uk/guidance/cg158">https://www.nice.org.uk/guidance/cg158</a></li><li>• Gorman DA, Gardner DM, Murphy AL, et al. Canadian guidelines on pharmacotherapy for disruptive and aggressive behaviour in children and adolescents with attention-deficit hyperactivity disorder, oppositional defiant disorder, or conduct disorder. <i>Can J Psychiatry</i>. Feb 2015;60(2):62-76.<br/>doi:10.1177/070674371506000204</li><li>• Steiner H, Remsing L, Work Group on Quality Issues. Practice parameter for the assessment and treatment of children and adolescents with oppositional defiant disorder. <i>J Am Acad Child Adolesc Psychiatry</i>. Jan 2007;46(1):126-141.<br/>doi:10.1097/01.chi.0000246060.62706.af</li></ul> |
| Elimination disorders             | <ul style="list-style-type: none"><li>• Graham KM, Levy JB. Enuresis. <i>Pediatrics In Review</i>. 2009;30(5):165-173. doi:10.1542/pir.30-5-165</li><li>• Har AF, Croffie JM. Encopresis. <i>Pediatrics In Review</i>. 2010;31(9):368-374. doi:10.1542/pir.31-9-368</li><li>• Vande Walle J, Rittig S, Bauer S, Eggert P, Marschall-Kehrel D, Tekgul S. Practical consensus guidelines for the management of enuresis. <i>European Journal of Pediatrics</i>. 2012;171(6):971-983. doi:10.1007/s00431-012-1687-7</li></ul>                                                                                                                                                                                                                                                                                                                                                                                                                                                                                                                                           |
| Pervasive developmental disorders | <ul style="list-style-type: none"><li>• Myers SM, Johnson CP, American Academy of Pediatrics Council on Children With Disabilities. Management of children with autism spectrum disorders. <i>Pediatrics</i>. Nov 2007;120(5):1162-82. doi:10.1542/peds.2007-2362</li><li>• Volkmar F, Siegel M, Woodbury-Smith M, et al. Practice parameter for the assessment and treatment of children and adolescents with autism spectrum disorder. <i>J Am Acad Child Adolesc Psychiatry</i>. Feb 2014;53(2):237-57.<br/>doi:10.1016/j.jaac.2013.10.013</li></ul>                                                                                                                                                                                                                                                                                                                                                                                                                                                                                                              |
| Psychotic disorders               | <ul style="list-style-type: none"><li>• McClellan J, Stock S, American Academy of Child and Adolescent Psychiatry Committee on Quality Issues. Practice parameter for the assessment and treatment of children and adolescents with schizophrenia. <i>J Am Acad Child Adolesc Psychiatry</i>. Sep 2013;52(9):976-90.<br/>doi:10.1016/j.jaac.2013.02.008</li><li>• Abidi S, Mian I, Garcia-Ortega I, et al. Canadian Guidelines for the Pharmacological Treatment of Schizophrenia Spectrum and Other Psychotic Disorders in Children and Youth.</li></ul>                                                                                                                                                                                                                                                                                                                                                                                                                                                                                                            |

---

---

Can J Psychiatry. Sep 2017;62(9):635-647.

doi:10.1177/0706743717720197

- National Institute for Health and Care Excellence. *Psychosis and schizophrenia in children and young people: recognition and management*. Clinical guideline number 155. 2013. <http://guidance.nice.org.-uk/CG155>.
-

**Supplemental Table 2.** Approach for psychopharmacology adequacy ratings for the five most common diagnoses

| <b>Disorder<br/>(% of<br/>participants<br/>diagnosed)</b> | <b>Standard of<br/>Care</b>                                                                                                 | <b>Adequate</b>                                                                                                                                                                                                                                                        | <b>Inadequate</b>                                           | <b>Inappropriate</b>                                                                        |
|-----------------------------------------------------------|-----------------------------------------------------------------------------------------------------------------------------|------------------------------------------------------------------------------------------------------------------------------------------------------------------------------------------------------------------------------------------------------------------------|-------------------------------------------------------------|---------------------------------------------------------------------------------------------|
| Attention deficit hyperactivity disorder (76%)            | Stimulant medication and/or alpha 2 agonist plus $\geq$ adequate pharmacologic treatment of any secondary comorbidities     | Psychotherapy with an NOS presentation<br><br>No medication but has a severe co-occurring problem (e.g., major depression, bipolar disorder, recent inpatient hospitalization discharge, suicidality) and that is being treated adequately                             | No medication for presentations other than NOS              | Medication not indicated for any of the patient's diagnoses or contraindicated polypharmacy |
| Disruptive behavior disorders (53%)                       | Psychotherapy plus $\geq$ adequate pharmacologic treatment of any secondary comorbidities                                   | Prescribed an atypical antipsychotic with evidence of significant aggression/disruptive behavior                                                                                                                                                                       | Comorbidities that are not adequately treated               | Medication not indicated for any of the patient's diagnoses or contraindicated polypharmacy |
| Anxiety disorders (32%)                                   | Psychotherapy with or without an antidepressant plus $\geq$ adequate pharmacologic treatment of any secondary comorbidities | An antidepressant with or without psychotherapy with comorbidities only partially treated (e.g., a child with comorbid ADHD treated with an antidepressant and therapy without a medication indicated for ADHD, but has only had 2 medication management appointments) | Comorbidities that are not adequately treated               | Medication not indicated for any of the patient's diagnoses or contraindicated polypharmacy |
| Bipolar disorders (25%)                                   | A mood stabilizer plus $\geq$ adequate pharmacologic treatment of any                                                       | No medication with an NOS presentation<br><br>A mood stabilizer and psychotherapy with                                                                                                                                                                                 | Psychotherapy monotherapy (psychotherapy as monotherapy was | Stimulants or antidepressants taken with no mood stabilizer                                 |

|                            |                                                                                                                                                                                                                         |                                                                                                                                                                                                                   |                                                                                                                                                                        |                                                                                             |
|----------------------------|-------------------------------------------------------------------------------------------------------------------------------------------------------------------------------------------------------------------------|-------------------------------------------------------------------------------------------------------------------------------------------------------------------------------------------------------------------|------------------------------------------------------------------------------------------------------------------------------------------------------------------------|---------------------------------------------------------------------------------------------|
|                            | secondary comorbidities                                                                                                                                                                                                 | comorbidities only partially treated (e.g., a child with comorbid ADHD treated with a mood stabilizer and therapy without a medication indicated for ADHD, but has only had 2 medication management appointments) | adequate for NOS presentation)<br>Treatment for comorbid conditions (other than stimulants and antidepressants) without an intervention indicated for bipolar disorder | Medication not indicated for any of the patient's diagnoses or contraindicated polypharmacy |
| Depressive disorders (18%) | An SSRI plus $\geq$ adequate pharmacologic treatment of any secondary comorbidities<br><br>Psychotherapy monotherapy for mild presentations plus $\geq$ adequate pharmacologic treatment of any secondary comorbidities | An SSRI and/or psychotherapy with comorbidities only partially treated                                                                                                                                            | Monotherapy in cases of severe presentations<br><br>Treatment for comorbid conditions without an intervention indicated for depression                                 | Medication not indicated for any of the patient's diagnoses or contraindicated polypharmacy |

*Note.* The strategy for determining “Treatment pending” ratings was the same regardless of diagnosis: No indicated treatment but evidence that treatment may be forthcoming (e.g., an evaluation, an intake appointment only, or 1-2 medication management sessions). Cases with no diagnosis receiving no treatment were rated as standard of care, while those taking medications that were not indicated were rated as inappropriate.

**Rater Background and Agreement**

Both professionals who reviewed and rated records for treatment adequacy have been involved with the LAMS study previously and have either been a study interviewer or and consensus expert at the original data collection for the study. The current manuscript is a secondary data analysis, but the data and approach to diagnosis are quite familiar to both raters. The raters did rely on the previously determined diagnoses, which were arrived upon via consensus review, which is considered a gold-standard diagnostic approach. One rater was a child psychiatrist with expertise in psychopharmacology. The other rater was a child psychologist health services researcher with expertise in psychotherapy. Ultimately, the analyses focused on adequacy of psychopharmacology. Notably, the child psychologist rater has spent her career in psychiatry departments within schools of medicine/academic medical centers, and, thus, has attended and continues to regularly attend seminars and lectures with a psychopharmacology focus. Further, as

a licensed psychologist, she has regularly collaborated with medication management providers in her patients' care and has familiarity with psychopharmacology treatment guidelines for childhood mental illness.

Even with previously described differences in clinical practice/expertise, only 25% of participants required a consensus discussion due to discordant psychopharmacology adequacy ratings across the five rating categories (standard of care, acceptable, inadequate, inappropriate, and treatment pending). Cases were discussed if there was any disagreement at all across those ratings. When considering the two collapsed rating groups used for the analysis (standard of care/acceptable vs. inadequate/inappropriate/treatment pending), percent disagreement across raters decreased to 13% ( $\kappa = .73$ ,  $SE = .03$ ) suggesting substantial interrater agreement. Supplemental Table 3 shows the proportion of cases in which the independent ratings of each rater agreed with the final consensus rating. Supplemental Table 4 shows the proportion of cases in which the independent raters agreed with each other before the consensus discussions. Raters demonstrated substantial agreement with each other and had similar rates of overlap with the final consensus ratings.

**Supplemental Table 3.** Crosstabs of Rater 1’s (Clinical Child Psychologist) and Rater 2’s (Child Psychiatrist) independent ratings with the final consensus rating

| <b>Child Psychologist’s Ratings</b>        | <b>Final Consensus Rating</b> |    |                                                |    |       |     |
|--------------------------------------------|-------------------------------|----|------------------------------------------------|----|-------|-----|
|                                            | Standard of care/<br>Adequate |    | Inadequate/Inappropriate/<br>Treatment Pending |    | Total |     |
|                                            | n                             | %  | n                                              | %  | N     | %   |
| Standard of care/ Adequate                 | 291                           | 94 | 41                                             | 14 | 332   | 55  |
| Inadequate/Inappropriate/Treatment Pending | 18                            | 6  | 251                                            | 86 | 269   | 45  |
| <b>Child Psychiatrist’s Ratings</b>        | n                             | %  | n                                              | %  | N     | %   |
| Standard of care/ Adequate                 | 293                           | 95 | 8                                              | 3  | 301   | 50  |
| Inadequate/Inappropriate/Treatment Pending | 16                            | 5  | 284                                            | 97 | 300   | 50  |
| Total (n and row %)                        | 309                           | 51 | 292                                            | 49 | 601   | 100 |

**Supplemental Table 4.** Crosstabs of the Clinical Child Psychologist’s and Child Psychiatrist’s independent ratings.

| <b>Child Psychologist’s Ratings</b>        | <b>Child Psychiatrist’s Ratings</b> |    |                                                |    |       |    |
|--------------------------------------------|-------------------------------------|----|------------------------------------------------|----|-------|----|
|                                            | Standard of care/<br>Adequate       |    | Inadequate/Inappropriate/<br>Treatment Pending |    | Total |    |
|                                            | n                                   | %  | n                                              | %  | N     | %  |
| Standard of care/ Adequate                 | 276                                 | 92 | 56                                             | 19 | 332   | 55 |
| Inadequate/Inappropriate/Treatment Pending | 25                                  | 8  | 244                                            | 81 | 269   | 45 |
